# Supplementary material for: Magnetism of single-doped paramagnetic tin clusters studied using temperature-dependent Stern–Gerlach experiments with enhanced sensitivity: impact of the diamagnetic ligand field and paramagnetic dopant
Source: Royal Society of Chemistry journal article supplement (doi:10.1039/d4cp00890a), 2024-01-01
Supplement: d4cp00890a1.pdf [file d4cp00890a1.pdf]

## Electronic Supporting Information

### Magnetism of single-doped paramagnetic tin clusters studied by temperature-dependent enhanced Stern-Gerlach experiments: Impact of the diamagnetic ligand and field and paramagnetic dopant

Filip Rivic,\* and Rolf Schäfer

Technical University of Darmstadt, Eduard-Zintl-Institute, Peter-Grünberg-Straße 8, 64287 Darmstadt, Germany.

## 1 Quantitative determination of Zero-Field Splitting in $\text{Sn}_{14}\text{Mn}$

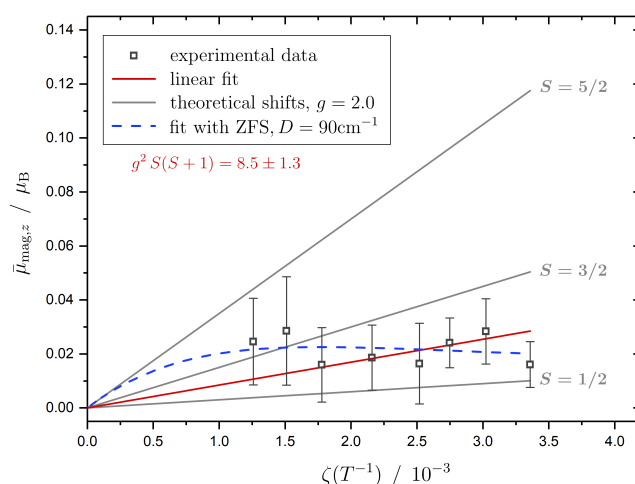

**Figure S1.** Temperature-dependent shift (black squares) for  $\text{Sn}_{14}\text{Mn}$  as shown in the main work. A linear function (red solid line) is fitted to the temperature-dependent shifts to determine the magnetic properties in combination with the theoretical shifts for different multiplicities  $S$  and  $g = 2$  (grey solid line). In the left upper corner of the Curie plots, the resulting slope of each linear fit function is listed. Here, the deviation from the Curie behaviour is additionally fitted as a blue dashed line by considering the temperature-dependent population of the  $|M_S|$  states. Assuming a multiplicity of  $S = 5/2$  and  $g = 2.0$ , a zero-field splitting constant of  $D = 90 \text{ cm}^{-1}$  results.

\*Corresponding author: filip.rivic@tu-darmstadt.de

## 2 Composition of the Molecular Orbitals

**Table S1.** Composition of the molecular orbitals of Sn<sub>14</sub>TM (TM = Cr, Mn, Fe) near the electron gap. Here, only the shares of the TMs atomic orbitals are shown with a threshold of 10 %. Additionally, the lowest-unoccupied (LUMO), the highest-occupied (HOMO) and the single-occupied molecular orbitals (SOMO) are indicated.

| MO  | Sn14Cr<br>Cr                                                                                                                                                                                                                                                  | Sn14Mn<br>Mn                                                                                                                                                                                                                    | Sn14Fe<br>Fe                                                                                                                                                                                                                     |
|-----|---------------------------------------------------------------------------------------------------------------------------------------------------------------------------------------------------------------------------------------------------------------|---------------------------------------------------------------------------------------------------------------------------------------------------------------------------------------------------------------------------------|----------------------------------------------------------------------------------------------------------------------------------------------------------------------------------------------------------------------------------|
| 150 | 5s, 6s, 3s, 4s                                                                                                                                                                                                                                                | 5s, 4s, 3s, 6s, 3d <sub>x<sup>2</sup>-y<sup>2</sup></sub>                                                                                                                                                                       | 5s, 3d <sub>xy</sub> , 4d <sub>xy</sub> , 6s, 4s, 3s, 3d <sub>xy</sub>                                                                                                                                                           |
| 151 | –                                                                                                                                                                                                                                                             | 3d <sub>z<sup>2</sup></sub> , 4d <sub>z<sup>2</sup></sub> , 3d <sub>x<sup>2</sup>-y<sup>2</sup></sub> , 5d <sub>z<sup>2</sup></sub> , 4d <sub>x<sup>2</sup>-y<sup>2</sup></sub>                                                 | 3d <sub>z<sup>2</sup></sub> , 4d <sub>z<sup>2</sup></sub> , 3d <sub>x<sup>2</sup>-y<sup>2</sup></sub> , 5d <sub>z<sup>2</sup></sub> , 4d <sub>x<sup>2</sup>-y<sup>2</sup></sub> , 5d <sub>x<sup>2</sup>-y<sup>2</sup></sub> , 6s |
| 152 | 5p <sub>x</sub>                                                                                                                                                                                                                                               | 3d <sub>yz</sub> , 4d <sub>yz</sub> , 5d <sub>yz</sub> , 6d <sub>yz</sub>                                                                                                                                                       | 3d <sub>xy</sub> , 4d <sub>xy</sub> , 5d <sub>xy</sub> , 6s, 5s, 3d <sub>z<sup>2</sup></sub>                                                                                                                                     |
| 153 | –                                                                                                                                                                                                                                                             | 3d <sub>x<sup>2</sup>-y<sup>2</sup></sub> , 4d <sub>x<sup>2</sup>-y<sup>2</sup></sub> , 3d <sub>z<sup>2</sup></sub> , 5d <sub>x<sup>2</sup>-y<sup>2</sup></sub> , 4d <sub>z<sup>2</sup></sub> , 5s, 5d <sub>z<sup>2</sup></sub> | 3d <sub>yz</sub> , 4d <sub>yz</sub> , 5d <sub>yz</sub> , 3d <sub>xz</sub> , 4d <sub>xz</sub>                                                                                                                                     |
| 154 | 5p <sub>y</sub>                                                                                                                                                                                                                                               | 5p <sub>x</sub>                                                                                                                                                                                                                 | 3d <sub>xz</sub> , 4d <sub>xz</sub> , 3d <sub>yz</sub> , 5d <sub>xz</sub> , 4d <sub>yz</sub> , 5d <sub>yz</sub>                                                                                                                  |
| 155 | –                                                                                                                                                                                                                                                             | 3d <sub>z<sup>2</sup></sub> , 4d <sub>z<sup>2</sup></sub> , 5d <sub>z<sup>2</sup></sub>                                                                                                                                         | 3d <sub>x<sup>2</sup>-y<sup>2</sup></sub> , 4d <sub>x<sup>2</sup>-y<sup>2</sup></sub> , 5d <sub>x<sup>2</sup>-y<sup>2</sup></sub>                                                                                                |
| 156 | 5p <sub>y</sub>                                                                                                                                                                                                                                               | 3d <sub>xz</sub> , 4d <sub>xz</sub> , 5d <sub>xz</sub> , 6d <sub>xz</sub>                                                                                                                                                       | 3d <sub>xz</sub> , 4d <sub>xz</sub>                                                                                                                                                                                              |
| 157 | 5p <sub>z</sub> , 3d <sub>z<sup>2</sup></sub> , 3d <sub>x<sup>2</sup>-y<sup>2</sup></sub>                                                                                                                                                                     | 3d <sub>xy</sub> , 4d <sub>xy</sub> , 5d <sub>xy</sub> , 6d <sub>xy</sub>                                                                                                                                                       | 3d <sub>z<sup>2</sup></sub> , 3d <sub>x<sup>2</sup>-y<sup>2</sup></sub> , 4d <sub>z<sup>2</sup></sub> , 4d <sub>x<sup>2</sup>-y<sup>2</sup></sub> , 5d <sub>x<sup>2</sup>-y<sup>2</sup></sub> , 5d <sub>z<sup>2</sup></sub>      |
| 158 | 5p <sub>x</sub>                                                                                                                                                                                                                                               | 5p <sub>y</sub> , 3d <sub>yz</sub>                                                                                                                                                                                              | 3d <sub>xy</sub>                                                                                                                                                                                                                 |
| 159 | 5p <sub>z</sub> , 3d <sub>x<sup>2</sup>-y<sup>2</sup></sub> , 3d <sub>z<sup>2</sup></sub> , 6s                                                                                                                                                                | 3d <sub>x<sup>2</sup>-y<sup>2</sup></sub> , 4d <sub>z<sup>2</sup></sub>                                                                                                                                                         | –                                                                                                                                                                                                                                |
| 160 | 3d <sub>yz</sub> , 6d <sub>yz</sub> , 4d <sub>yz</sub> , 5d <sub>yz</sub>                                                                                                                                                                                     | –                                                                                                                                                                                                                               | 3d <sub>xz</sub>                                                                                                                                                                                                                 |
| 161 | 3d <sub>xy</sub> , 4d <sub>xy</sub> , 6d <sub>xy</sub> , 5d <sub>xy</sub>                                                                                                                                                                                     | 5p <sub>y</sub> , 3d <sub>yz</sub>                                                                                                                                                                                              | 3d <sub>xy</sub>                                                                                                                                                                                                                 |
| 162 | 3d <sub>xz</sub> , 4d <sub>xz</sub> , 5d <sub>xz</sub> , 6d <sub>xz</sub>                                                                                                                                                                                     | 5p <sub>z</sub> , 2p <sub>z</sub>                                                                                                                                                                                               | 5p <sub>z</sub> , 6s                                                                                                                                                                                                             |
| 163 | 3d <sub>z<sup>2</sup></sub> , 3d <sub>x<sup>2</sup>-y<sup>2</sup></sub> , 4d <sub>z<sup>2</sup></sub> , 5d <sub>z<sup>2</sup></sub> , 4d <sub>x<sup>2</sup>-y<sup>2</sup></sub> , 5s, 6d <sub>z<sup>2</sup></sub> , 5d <sub>x<sup>2</sup>-y<sup>2</sup></sub> | 5p <sub>x</sub>                                                                                                                                                                                                                 | 5p <sub>y</sub>                                                                                                                                                                                                                  |
| 164 | 3d <sub>xy</sub> , 4d <sub>xy</sub> , 6d <sub>xy</sub> , 5d <sub>xy</sub>                                                                                                                                                                                     | –                                                                                                                                                                                                                               | –                                                                                                                                                                                                                                |
| 165 | 3d <sub>xz</sub> , 4d <sub>xz</sub> , 5p <sub>x</sub> , 5d <sub>xz</sub>                                                                                                                                                                                      | 5p <sub>x</sub>                                                                                                                                                                                                                 | –                                                                                                                                                                                                                                |
| 166 | [HOMO] 3d <sub>yz</sub> , 4d <sub>yz</sub> , 6d <sub>yz</sub> , 5d <sub>yz</sub>                                                                                                                                                                              | –                                                                                                                                                                                                                               | [SOMO] 6s, 3d <sub>xy</sub> , 3d <sub>z<sup>2</sup></sub>                                                                                                                                                                        |
| 167 | [LUMO] 3d <sub>z<sup>2</sup></sub> , 3d <sub>x<sup>2</sup>-y<sup>2</sup></sub> , 4d <sub>z<sup>2</sup></sub> , 4d <sub>x<sup>2</sup>-y<sup>2</sup></sub> , 5d <sub>z<sup>2</sup></sub> , 5d <sub>x<sup>2</sup>-y<sup>2</sup></sub> , 6s                       | [SOMO] 3d <sub>x<sup>2</sup>-y<sup>2</sup></sub> , 6s, 3d <sub>z<sup>2</sup></sub> , 4d <sub>x<sup>2</sup>-y<sup>2</sup></sub>                                                                                                  | 3d <sub>yz</sub>                                                                                                                                                                                                                 |
| 168 | 6s, 3d <sub>x<sup>2</sup>-y<sup>2</sup></sub> , 3d <sub>z<sup>2</sup></sub> , 4d <sub>x<sup>2</sup>-y<sup>2</sup></sub> , 5d <sub>x<sup>2</sup>-y<sup>2</sup></sub> , 4d <sub>z<sup>2</sup></sub> , 5d <sub>z<sup>2</sup></sub>                               | [LUMO] 6s, 3d <sub>z<sup>2</sup></sub> , 3d <sub>x<sup>2</sup>-y<sup>2</sup></sub>                                                                                                                                              | [SOMO] 6s, d <sub>z<sup>2</sup></sub> , 3d <sub>xy</sub>                                                                                                                                                                         |
| 169 | 3d <sub>yz</sub> , 4d <sub>yz</sub> , 5d <sub>yz</sub>                                                                                                                                                                                                        | 3d <sub>yz</sub> , 4d <sub>yz</sub>                                                                                                                                                                                             | [LUMO] 3d <sub>yz</sub>                                                                                                                                                                                                          |
| 170 | 3d <sub>xz</sub> , 4d <sub>xz</sub> , 5d <sub>xz</sub>                                                                                                                                                                                                        | 3d <sub>xz</sub> , 4d <sub>xz</sub>                                                                                                                                                                                             | –                                                                                                                                                                                                                                |
| 171 | 3d <sub>xy</sub> , 4d <sub>xy</sub> , 5d <sub>xy</sub>                                                                                                                                                                                                        | 3d <sub>xy</sub> , 4d <sub>xy</sub>                                                                                                                                                                                             | 6s, 3d <sub>x<sup>2</sup>-y<sup>2</sup></sub>                                                                                                                                                                                    |
| 172 | 3d <sub>yz</sub> , 5p <sub>y</sub>                                                                                                                                                                                                                            | 5p <sub>y</sub>                                                                                                                                                                                                                 | –                                                                                                                                                                                                                                |
| 173 | 3d <sub>xz</sub>                                                                                                                                                                                                                                              | –                                                                                                                                                                                                                               | 6s, 3d <sub>x<sup>2</sup>-y<sup>2</sup></sub>                                                                                                                                                                                    |
| 174 | 6s, 3d <sub>x<sup>2</sup>-y<sup>2</sup></sub>                                                                                                                                                                                                                 | 6s                                                                                                                                                                                                                              | 3d <sub>xz</sub> , 5p <sub>x</sub>                                                                                                                                                                                               |
| 175 | 6s, 3d <sub>z<sup>2</sup></sub> , 5s, 3d <sub>x<sup>2</sup>-y<sup>2</sup></sub>                                                                                                                                                                               | 6s, 5s, 3d <sub>z<sup>2</sup></sub>                                                                                                                                                                                             | 6s, 5s, 4s                                                                                                                                                                                                                       |
